# Supplementary material
Source: PubMed Central journal article supplement (PMC4601641)
Supplement: NIHMS673695-supplement-Supplemental.pdf [file NIHMS673695-supplement-Supplemental.pdf]

## SUPPLEMENTAL MATERIAL

### **Montalcino Aortic Consortium (MAC)**

Reed Pyeritz MD PhD (University of Pennsylvania School of Medicine, USA), Dianna Milewicz MD PhD (University of Texas Health Science Center at Houston, USA), Guillaume Jondeau MD PhD (AP-HP, Hôpital Bichat, Centre National de Référence pour le syndrome de Marfan et apparentés; Université Paris 7; AP-HP, Hôpital Bichat, Service de Cardiologie; INSERM, U1148, Paris, France), Eloisa Arbustini MD (Centre for Inherited Cardiovascular Diseases, Pavia, Italy), Catherine Boileau PharmD PhD (AP-HP, Hôpital Bichat, Centre National de Référence pour le syndrome de Marfan et apparentés, Paris, France; Université Paris 7; AP-HP, Hôpital Bichat, Laboratoire de Génétique moléculaire, Paris, France; INSERM, U1148, Paris, France), Julie De Backer MD PhD (Ghent University, Ghent, Belgium), Anne De Paepe MD PhD (Ghent University, Ghent, Belgium), Ismail El-Hamamsy MD PhD (Université de Montréal, Montreal, Canada), Josephine Grima PhD (The Marfan Foundation, USA), David Liang MD PhD (Stanford University School of Medicine, USA), Irene Maumenee MD (University of Illinois at Chicago, USA), Rocio Moran MD (Cleveland Clinic, USA), Dieter Reinhardt PhD (McGill University, Montreal, Canada), Lynn Sakai PhD (Oregon Health and Science University, USA), Francesco Ramirez PhD (Mount Sinai School of Medicine, USA), Richmond Jeremy MB BS PhD (University of Sydney, Australia), Bo Carlberg MD PhD (Umeå University, Sweden)

**Referring Physicians, Genetic Counselors, and Other Health Professionals**

Abuelo, Diane (Rhode Island Hospital); Ades, Lesley (University of Sydney); Alhopuro, Pia (Helsinki University Central Hospital); Arno, Gavin (St. George's University of London); Arscott, Patricia (Cleveland Clinic); Benedict, Susan (University of Utah); Bernhardt, Barbara (Hospital of the University of Pennsylvania); Bishay, Dani (University of Nebraska Medical Center); Boileau, Catherine (Hôpital Bichat); Braverman, Alan (Washington University School of Medicine in St. Louis); Child, Anne (St. George's, University of London); Chipman, Hope (University of Nebraska Medical Center); Fan, Yuxin (John Welsh Cardiovascular Diagnostic Laboratory); Fitzgerald-Butt, Sara (Nationwide Children's Hospital); Grange, Dorothy (Washington University School of Medicine in St. Louis); Hanna, Nadine (Hôpital Bichat); Hyland, James (Connective Tissue Gene Tests); Liang, David (Stanford University School of Medicine); Lorenz, Birgit (Justus Liebig University); Maher, Joseph (University of Texas Southwestern Medical Center); Mark, Paul (Spectrum Health Butterworth Hospital); McBride, Kim (Nationwide Children's Hospital); McConnell, Vivienne (Belfast City Hospital); Mendoza, Roberto (The Hospital for Sick Children); Morisaki, Takayuki (National Cerebral and Cardiovascular Center Research Institute); Niyazov, Dmitri (Ochsner Health System); Okamoto, Nobuhiko (Osaka Medical Center and Research Institute for Maternal and Child Health); Olney, Ann (University of Nebraska Medical Center); Ostergaard, John (University of Aarhus); Pellone, Sunny (Stanford Hospital); Penney, Lynette (IWK Health Center Maritime Medical Genetics Services); Philip, Sunny George (Birmingham Children's Hospital); Pyeritz, Reed (Hospital of the University of Pennsylvania); Richer, Julie (Children's Hospital of Eastern Ontario ); Rigelsky, Christina (Cleveland Clinic); Rodarmer, Ryan (Spectrum Health Butterworth Hospital); Roten, Lisa (Cook Children's Heart Center); Sallee, Denver (Sibley Heart Center

Cardiology/Children's Healthcare of Atlanta); Shiono, Junko (Ibaraki Children's Hospital); Singh, Michael (Boston Adult Congenital Heart Service Children's Hospital); Sturm, Amy (Wexner Medical Center); Tekin, Mustafa (John P. Hussman Institute for Human Genetics); Willing, Marcia (Washington University School of Medicine in St. Louis); Wilnai, Yael (Stanford University School of Medicine)

Supplemental Table 1. Predicted functional impact of 41 *ACTA2* mutations and frequency and age at presentation of aortic events or last follow-up of families and individuals assessed.

| Exon | Nucleotide change* | Amino acid substitution <sup>†</sup> | PolyPhen-2 <sup>1</sup> | PROVEAN <sup>2</sup> /<br>SIFT | Mutation Taster <sup>3</sup> | Mutation Assessor <sup>4</sup> | LRT <sup>5</sup> | FATHMM <sup>6</sup> | # of families assessed | # of individuals assessed | With aortic event |                       | Without aortic event |                       |
|------|--------------------|--------------------------------------|-------------------------|--------------------------------|------------------------------|--------------------------------|------------------|---------------------|------------------------|---------------------------|-------------------|-----------------------|----------------------|-----------------------|
|      |                    |                                      |                         |                                |                              |                                |                  |                     |                        |                           | n                 | Median age (min- max) | n                    | Median age (min- max) |
| 2    | c.55T>C            | p.C19R                               | possibly damaging       | Deleterious                    | disease causing              | high                           | Neutral          | Damaging            | 1                      | 1                         | 1                 | 49                    | 0                    |                       |
| 2    | c.64G>A            | p.G22S                               | possibly damaging       | Deleterious                    | disease causing              | high                           | Deleterious      | Damaging            | 1                      | 2                         | 1                 | 31                    | 1                    | 68                    |
| 2    | c.115C>T           | p.R39C <sup>7-9</sup>                | benign                  | Deleterious                    | disease causing              | medium                         | Deleterious      | Damaging            | 2                      | 2                         | 2                 | 26 (22- 30)           | 0                    |                       |
| 2    | c.115C>G           | p.R39G                               | possibly damaging       | Deleterious                    | disease causing              | high                           | Deleterious      | Damaging            | 1                      | 14                        | 4                 | 29.5 (22- 37)         | 10                   | 35.5 (1- 65)          |
| 2    | c.116G>A           | p.R39H <sup>10</sup>                 | benign                  | Neutral                        | disease causing              | medium                         | Deleterious      | Damaging            | 2                      | 12                        | 7                 | 37 (23- 76)           | 5                    | 34 (22- 68)           |
| 3    | c.143G>T           | p.G48V                               | probably damaging       | Deleterious                    | disease causing              | high                           | Deleterious      | Damaging            | 1                      | 2                         | 1                 | 42                    | 1                    | 49                    |
| 3    | c.145A>G           | p.M49V <sup>7,9</sup>                | benign                  | Neutral                        | disease causing              | medium                         | Deleterious      | Damaging            | 1                      | 3                         | 1                 | 35                    | 2                    | 11 (8- 14)            |
| 3    | c.191G>A           | p.R64K                               | benign                  | Neutral                        | disease causing              | medium                         | Deleterious      | Damaging            | 1                      | 1                         | 1                 | 49                    | 0                    |                       |
| 3    | c.206T>A           | p.L69Q                               | probably damaging       | Deleterious                    | disease causing              | high                           | Neutral          | Damaging            | 1                      | 3                         | 3                 | 51 (39- 62)           | 0                    |                       |
| 3    | c.215C>A           | p.P72Q <sup>10</sup>                 | probably damaging       | Deleterious                    | disease causing              | high                           | Deleterious      | Damaging            | 1                      | 5                         | 1                 | 47                    | 4                    | 12 (1- 27)            |
| 4    | c.262T>C           | p.W88R                               | probably damaging       | Deleterious                    | disease causing              | high                           | Deleterious      | Damaging            | 1                      | 10                        | 3                 | 37 (12- 51)           | 7                    | 55 (21- 62)           |
| 4    | c.350A>C           | p.N117T <sup>11</sup>                | possibly damaging       | Deleterious                    | disease causing              | high                           | Deleterious      | Damaging            | 1                      | 4                         | 2                 | 41 (29- 53)           | 2                    | 62.5 (56- 69)         |
| 4    | c.353G>A           | p.R118Q <sup>11</sup>                | probably damaging       | Deleterious                    | disease causing              | high                           | Deleterious      | Damaging            | 2                      | 14                        | 8                 | 41 (12- 57)           | 6                    | 44.5 (24- 80)         |
| 5    | c.403T>C           | p.Y135H <sup>11</sup>                | probably damaging       | Deleterious                    | disease causing              | medium                         | Deleterious      | Damaging            | 1                      | 4                         | 1                 | 52                    | 3                    | 48 (35- 53)           |
| 5    | c.422T>C           | p.V141A                              | possibly damaging       | Deleterious                    | disease causing              | medium                         | Deleterious      | Damaging            | 1                      | 3                         | 1                 | 21                    | 2                    | 34.5 (20- 49)         |
| 5    | c.442G>A           | p.G148R                              | probably damaging       | Deleterious                    | disease causing              | high                           | Deleterious      | Damaging            | 1                      | 4                         | 4                 | 44.5 (36- 60)         | 0                    |                       |
| 5    | c.445C>T           | p.R149C <sup>11-13</sup>             | probably damaging       | Deleterious                    | disease causing              | high                           | Deleterious      | Damaging            | 10                     | 69                        | 33                | 29 (13- 56)           | 36                   | 30 (3- 77)            |
| 6    | c.461T>C           | p.V154A <sup>11</sup>                | probably damaging       | Deleterious                    | disease causing              | medium                         | Deleterious      | Damaging            | 1                      | 7                         | 2                 | 33.5 (31- 36)         | 5                    | 25 (13- 73)           |
| 6    | c.479G>A           | p.G160D <sup>10</sup>                | probably damaging       | Deleterious                    | disease causing              | medium                         | Deleterious      | Damaging            | 2                      | 9                         | 4                 | 32 (23- 51)           | 5                    | 54 (1- 85)            |

|   |            |                           |                   |             |                 |        |             |          |    |    |   |               |    |               |
|---|------------|---------------------------|-------------------|-------------|-----------------|--------|-------------|----------|----|----|---|---------------|----|---------------|
| 6 | c.489C>A   | p.H163Q                   | possibly damaging | Deleterious | disease causing | medium | Deleterious | Damaging | 1  | 1  | 1 | 41            | 0  |               |
| 6 | c.496C>A   | p.P166T                   | possibly damaging | Deleterious | disease causing | high   | Deleterious | Damaging | 1  | 2  | 2 | 39.5 (19- 60) | 0  |               |
| 6 | c.535C>T   | p.R179C <sup>14</sup>     | probably damaging | Deleterious | disease causing | high   | Deleterious | Damaging | 4  | 4  | 1 | 14            | 3  | 4 (2- 4)      |
| 6 | c.536G>A   | p.R179H <sup>15-19</sup>  | benign            | Deleterious | disease causing | medium | Deleterious | Damaging | 15 | 15 | 6 | 13 (11- 25)   | 9  | 8 (1- 14)     |
| 6 | c.536G>T   | p.R179L <sup>20</sup>     | possibly damaging | Deleterious | disease causing | high   | Deleterious | Damaging | 1  | 1  | 0 |               | 1  | 5             |
| 6 | c.554G>A   | p.R185Q <sup>10</sup>     | probably damaging | Deleterious | disease causing | high   | Deleterious | Damaging | 2  | 9  | 2 | 54 (41- 67)   | 7  | 54 (15- 77)   |
| 6 | c.592C>T   | p.R198C                   | probably damaging | Deleterious | disease causing | medium | Deleterious | Damaging | 2  | 2  | 2 | 22 (12- 32)   | 0  |               |
| 6 | c.593G>A   | p.R198H                   | benign            | Deleterious | disease causing | medium | Deleterious | Damaging | 1  | 3  | 2 | 43 (41- 45)   | 1  | 33            |
| 7 | c.635G>A   | p.R212Q <sup>10, 12</sup> | probably damaging | Deleterious | disease causing | medium | Deleterious | Damaging | 3  | 16 | 6 | 31 (16- 53)   | 10 | 17.5 (2- 76)  |
| 7 | c.732G>T   | p.L244F                   | possibly damaging | Deleterious | disease causing | high   | Deleterious | Damaging | 1  | 2  | 1 | 14            | 1  | 46            |
| 7 | c.734C>T   | p.P245L <sup>10</sup>     | possibly damaging | Deleterious | disease causing | high   | Deleterious | Damaging | 1  | 1  | 1 | 27            | 0  |               |
| 7 | c.748A>C   | p.I250L <sup>10</sup>     | possibly damaging | Neutral     | disease causing | medium | Deleterious | Damaging | 1  | 1  | 1 | 37            | 0  |               |
| 7 | c.772C>T   | p.R258C <sup>11</sup>     | probably damaging | Deleterious | disease causing | high   | Deleterious | Damaging | 5  | 12 | 6 | 26 (15- 52)   | 6  | 18.5 (5- 63)  |
| 7 | c.773G>A   | p.R258H <sup>11</sup>     | probably damaging | Deleterious | disease causing | high   | Deleterious | Damaging | 3  | 11 | 9 | 35 (16- 57)   | 2  | 21 (16- 26)   |
| 7 | c.808G>A   | p.G270R                   | probably damaging | Deleterious | disease causing | high   | Deleterious | Damaging | 1  | 1  | 1 | 69            | 0  |               |
| 8 | c.824G>C   | p.G275A                   | probably damaging | Deleterious | disease causing | high   | Deleterious | Damaging | 1  | 1  | 1 | 43            | 0  |               |
| 8 | c.874A>G   | p.R292G <sup>11</sup>     | probably damaging | Deleterious | disease causing | high   | Deleterious | Damaging | 1  | 5  | 3 | 36 (26- 48)   | 2  | 62.5 (53- 72) |
| 8 | c.904T>G   | p.S302A                   | possibly damaging | Neutral     | disease causing | medium | Deleterious | Damaging | 1  | 4  | 2 | 41 (37- 45)   | 2  | 18 (1- 35)    |
| 8 | c.977C>A   | p.T326N <sup>10</sup>     | benign            | Neutral     | disease causing | low    | Deleterious | Damaging | 1  | 4  | 0 |               | 4  | 55.5 (35- 75) |
| 8 | c.984G>T   | p.K328N                   | possibly damaging | Deleterious | disease causing | medium | Deleterious | Damaging | 1  | 2  | 2 | 17            | 0  |               |
| 8 | c.990+1G>C |                           | NA                | NA          | disease causing | NA     | NA          | NA       | 1  | 1  | 1 | 48            | 0  |               |
| 9 | c.1058C>A  | p.T353N <sup>11</sup>     | possibly damaging | Deleterious | disease causing | medium | Deleterious | Damaging | 1  | 10 | 2 | 33 (17- 49)   | 8  | 31 (9- 72)    |

---

\*Annotation of cDNA and protein changes are based on the *ACTA2* reference sequence NM\_001613.2; †references are cited if the mutation has been previously reported; “n” indicates number of individuals with or without an aortic event; ”min- max” means minimum to maximum age at aortic event; NA means not available.

Supplemental Table 2. Medical histories, aortic disease characteristics and in-hospital treatment and outcomes of 70 *ACTA2* patients who presented for surgical repair due to aneurysm or dissection.

| Variable*                                | Ascending<br>aortic<br>aneurysm | Acute Thoracic Aortic Dissection |               |             | Chronic<br>Type B<br>dissection |
|------------------------------------------|---------------------------------|----------------------------------|---------------|-------------|---------------------------------|
|                                          |                                 | Type A                           | Type B        | All         |                                 |
| n                                        | 10                              | 41                               | 10            | 51          | 9                               |
| Age, years                               | 36.5 (25- 44)                   | 36 (29- 46)                      | 28.5 (21- 41) | 36 (27- 46) | 21 (16- 26)                     |
| Maximum aortic diameter, cm              | 5.2 (5- 5.5)                    | 5.75 (4.7- 6.75)                 | 4.8           |             | 6 (4.1- 6.5)                    |
| <b>Aortic disease at other locations</b> |                                 |                                  |               |             |                                 |
| Ascending aorta                          | NA                              | NA                               | 3 (30)        |             | 1 (11)                          |
| Descending aorta                         | 2 (2)                           | 2 (5)                            | NA            |             | NA                              |
| Abdominal aorta                          | 1 (10)                          | 0                                | 0             |             | 0                               |
| <b>Presenting symptoms</b>               |                                 |                                  |               |             |                                 |
| Any symptom                              | 4 (40)                          | 38 (97)                          | 10 (100)      | 48 (98)     | 8 (100)                         |
| Any pain                                 | 4 (40)                          | 31 (80)                          | 10 (100)      | 41 (84)     | 6 (75)                          |
| Chest pain                               | 4 (40)                          | 23 (60)                          | 8 (80)        | 31 (65)     | 4 (50)                          |
| Back pain                                | 1 (10)                          | 4 (10)                           | 8 (80)        | 12 (25)     | 3 (38)                          |
| Abdominal pain                           | 0                               | 6 (15)                           | 4 (40)        | 10 (20)     | 0                               |
| Neck/jaw pain                            | 0                               | 8 (20)                           | 0             | 8 (16)      | 0                               |
| Upper extremity pain                     | 0                               | 2 (5)                            | 2 (20)        | 4 (8)       | 0                               |
| Lower extremity pain                     | 0                               | 2 (5)                            | 1 (10)        | 3 (6)       | 0                               |
| Hypotension                              | 0                               | 5 (13)                           | 0             | 5 (10)      | 0                               |
| Hypertension                             | 0                               | 3 (8)                            | 4 (40)        | 7 (14)      | 0                               |
| Congestive heart failure                 | 0                               | 2 (5)                            | 0             | 2 (4)       | 0                               |
| Dyspnea                                  | 3 (30)                          | 8 (20)                           | 1 (10)        | 9 (18)      | 1 (12)                          |
| Pulse deficit                            | 0                               | 7 (20)                           | 2 (20)        | 9 (18)      | 0                               |

|                                        |        |         |        |         |        |
|----------------------------------------|--------|---------|--------|---------|--------|
| Syncope                                | 0      | 7 (18)  | 0      | 7 (14)  | 0      |
| Vomiting                               | 0      | 6 (15)  | 2 (20) | 8 (16)  | 1 (12) |
| Extremity numbness/weakness            | 0      | 3 (8)   | 4 (40) | 7 (14)  | 0      |
| Edema                                  | 0      | 2 (5)   | 1 (10) | 3 (6)   | 0      |
| Diarrhea                               | 0      | 0       | 1 (10) | 1 (2)   | 1 (12) |
| Malaise/fatigue                        | 1 (10) | 2 (5)   | 0      | 2 (4)   | 0      |
| Neurologic                             | 0      | 9 (23)  | 1 (10) | 10 (20) | 1 (12) |
| <b>Medical histories</b>               |        |         |        |         |        |
| Bicuspid aortic valve                  | 1 (10) | 1 (2)   | 0      | 1 (2)   | 0      |
| Hypertension                           | 1 (10) | 9 (23)  | 3 (30) | 12 (24) | 3 (33) |
| Hypercholesterolemia                   | 2 (20) | 2 (5)   | 0      | 2 (4)   | 0      |
| Recent pregnancy                       | 0      | 5 (33)  | 1 (17) | 6 (29)  | 0      |
| Stroke                                 | 1 (10) | 2 (5)   | 0      | 2 (4)   | 0      |
| Myocardial infarction                  | 0      | 2 (5)   | 0      | 2 (4)   | 0      |
| Patent ductus arteriosus               | 3 (30) | 2 (5)   | 0      | 2 (4)   | 0      |
| Mitral valve prolapse                  | 0      | 1 (3)   | 0      | 1 (2)   | 0      |
| Family history of TAAD                 | 6 (67) | 17 (55) | 5 (62) | 22 (56) | 4 (57) |
| <b>In-hospital treatment</b>           |        |         |        |         |        |
| Composite valve graft root replacement | 4 (40) | 18 (44) | 0      |         | 0      |
| Valve-sparing root replacement         | 5 (50) | 2 (5)   | 0      |         | 0      |
| Ascending aortic replacement           | 1 (10) | 17 (42) | 0      |         | 0      |
| Aortic arch replacement (partial)      | 1 (10) | 8 (20)  | 0      |         | 0      |
| Aortic arch replacement (total)        | 2 (20) | 4 (10)  | 0      |         | 0      |
| Descending aorta replacement           | 0      | 0       | 2 (20) |         | 1 (11) |
| Extent I TAAA repair                   | 0      | 0       | 0      |         | 7 (78) |
| Extent II TAAA repair                  | 0      | 0       | 0      |         | 1 (11) |
| Aorto-bifemoral bypass                 | 0      | 0       | 1 (10) |         | 0      |



|                                     |          |            |            |            |             |
|-------------------------------------|----------|------------|------------|------------|-------------|
| Endovascular repair                 | 0        | 0          | 3 (30)     |            | 0           |
| Medical therapy                     | 0        | 0          | 4 (40)     |            | 0           |
| <b>Peri-operative complications</b> |          |            |            |            |             |
| Tamponade                           | 1 (10)   | 7 (34)     | 0          | 7 (16)     | 0           |
| Myocardial infarction               | 0        | 3 (9)      | 0          | 3 (7)      | 0           |
| Neurological deficit                | 0        | 3 (34)     | 0          | 3 (7)      | 1 (17)      |
| Limb ischemia                       | 0        | 2 (6)      | 1 (11)     | 3 (7)      | 1 (17)      |
| Renal failure                       | 0        | 6 (18)     | 1 (11)     | 7 (16)     | 0           |
| Mesenteric ischemia                 | 0        | 0          | 0          | 0          | 3 (33)      |
| Atrial fibrillation                 | 1 (11)   | 5 (15)     | 0          | 5 (12)     | 1 (17)      |
| # days hospitalized                 | 6 (5- 9) | 10 (8- 18) | 12 (9- 23) | 11 (8- 18) | 19 (14- 38) |
| In-hospital deaths                  | 0        | 6 (15)     | 1 (10)     | 7 (14)     | 0           |

---

\*Categorical variables are presented as # of individuals and percentage in parenthesis (missing values were excluded in calculations) and continuous variables are presented as median (interquartile range); NA- not applicable.

## References

1. Adzhubei IA, Schmidt S, Peshkin L, Ramensky VE, Gerasimova A, Bork P et al. A method and server for predicting damaging missense mutations. *Nat Methods*. 2010;7:248-249.
2. Choi Y, Sims GE, Murphy S, Miller JR, Chan AP. Predicting the functional effect of amino acid substitutions and indels. *PLoS ONE*. 2012;7:e46688.
3. Schwarz JM, Rodelsperger C, Schuelke M, Seelow D. MutationTaster evaluates disease-causing potential of sequence alterations. *Nat Methods*. 2010;7:575-576.
4. Reva B, Antipin Y, Sander C. Predicting the functional impact of protein mutations: application to cancer genomics. *Nucleic Acids Res*. 2011;39:e118.
5. Chun S, Fay JC. Identification of deleterious mutations within three human genomes. *Genome Res*. 2009;19:1553-1561.
6. Shihab HA, Gough J, Cooper DN, Stenson PD, Barker GL, Edwards KJ et al. Predicting the functional, molecular, and phenotypic consequences of amino acid substitutions using hidden Markov models. *Hum Mutat*. 2013;34:57-65.
7. Hoffjan S, Waldmuller S, Blankenfeldt W, Kotting J, Gehle P, Binner P et al. Three novel mutations in the ACTA2 gene in German patients with thoracic aortic aneurysms and dissections. *Eur J Hum Genet*. 2011;19:520-524.
8. Imai T, Horigome H, Shiono J, Hiramatsu Y. Isolated giant ascending aortic aneurysm in a child: a novel mutation of the ACTA2 gene. *Eur J Cardiothorac Surg*. 2011;40:e156-e157.
9. Renard M, Callewaert B, Baetens M, Campens L, MacDermot K, Fryns JP et al. Novel MYH11 and ACTA2 mutations reveal a role for enhanced TGFbeta signaling in FTAAD. *Int J Cardiol*. 2013;165:314-321.
10. Guo DC, Papke CL, Tran-Fadulu V, Regalado ES, Avidan N, Johnson RJ et al. Mutations in smooth muscle alpha-actin (ACTA2) cause coronary artery disease, stroke, and moyamoya disease, along with thoracic aortic disease. *Am J Hum Genet*. 2009;84:617-627.
11. Guo DC, Pannu H, Papke CL, Yu RK, Avidan N, Bourgeois S et al. Mutations in smooth muscle alpha-actin (ACTA2) lead to thoracic aortic aneurysms and dissections. *Nat Genet*. 2007;39:1488-1493.
12. Morisaki H, Akutsu K, Ogino H, Kondo N, Yamanaka I, Tsutsumi Y et al. Mutation of ACTA2 gene as an important cause of familial and nonfamilial nonsyndromic thoracic aortic aneurysm and/or dissection (TAAD). *Hum Mutat*. 2009;30:1406-1411.

13. Disabella E, Grasso M, Gambarin FI, Narula N, Dore R, Favalli V et al. Risk of dissection in thoracic aneurysms associated with mutations of smooth muscle alpha-actin 2 (ACTA2). *Heart*. 2011;97:321-326.
14. Meuwissen ME, Lequin MH, Bindels-de HK, Bruggenwirth HT, Knapen MF, Dalinghaus M et al. ACTA2 mutation with childhood cardiovascular, autonomic and brain anomalies and severe outcome. *Am J Med Genet A*. 2013;161A:1376-1380.
15. Milewicz DM, Ostergaard JR, la-Kokko LM, Khan N, Grange DK, Mendoza-Londono R et al. De novo ACTA2 mutation causes a novel syndrome of multisystemic smooth muscle dysfunction. *Am J Med Genet A*. 2010;152A:2437-2443.
16. Moosa AN, Traboulsi EI, Reid J, Prieto L, Moran R, Friedman NR. Neonatal stroke and progressive leukoencephalopathy in a child with an ACTA2 mutation. *J Child Neurol*. 2013;28:531-534.
17. Richer J, Milewicz DM, Gow R, de NJ, Maharajh G, Miller E et al. R179H mutation in ACTA2 expanding the phenotype to include prune-belly sequence and skin manifestations. *Am J Med Genet A*. 2012;158A:664-668.
18. Al-Mohaisen M, Allanson JE, O'Connor MD, Veinot JP, Brandys TM, Maharajh G et al. Brachial artery occlusion in a young adult with an ACTA2 thoracic aortic aneurysm. *Vasc Med*. 2012;17:326-329.
19. Roder C, Peters V, Kasuya H, Nishizawa T, Wakita S, Berg D et al. Analysis of ACTA2 in European Moyamoya disease patients. *Eur J Paediatr Neurol*. 2011;15:117-122.
20. Munot P, Saunders DE, Milewicz DM, Regalado ES, Ostergaard JR, Braun KP et al. A novel distinctive cerebrovascular phenotype is associated with heterozygous Arg179 ACTA2 mutations. *Brain*. 2012;135:2506-2514.
